# Supplementary material for: Gene regulatory network topology governs resistance and treatment escape in glioma stem-like cells
Source: PubMed Central journal article supplement — bioRxiv. 2024 Feb 7:2024.02.02.578510. Preprint. [Version 1] doi: 10.1101/2024.02.02.578510 (PMC10871280; doi:10.1101/2024.02.02.578510), 2024-02-07
Supplement: media-1.pdf [file media-1.pdf]

1 **Supplementary Materials for**

2

3 **Gene Regulatory Network topology governs resistance and treatment**  
4 **escape in glioma stem-like cells**

5

6 James H. Park<sup>1</sup>, Parvinder Hothi<sup>2</sup>, Adrian Lopez Garcia de Lomana<sup>3</sup>, Min Pan<sup>1</sup>, Rachel Calder<sup>1</sup>,  
7 Serdar Turkarslan<sup>1</sup>, Wei-Ju Wu<sup>1</sup>, Hwahyung Lee<sup>2</sup>, Anoop P. Patel<sup>4,5</sup>, Charles Cobbs<sup>2</sup>, Sui Huang<sup>1</sup>,  
8 Nitin S. Baliga<sup>1,6,\*</sup>

9 1. Institute for Systems Biology, Seattle, WA.

10 2. Ivy Center for Advanced Brain Tumor Treatment, Swedish Neuroscience Institute, Seattle,  
11 WA.

12 3. Center for Systems Biology, University of Iceland, Reykjavik, Iceland.

13 4. Department of Neurosurgery, Preston Robert Tisch Brain Tumor Center, Duke University,  
14 Durham, NC.

15 5. Center for Advanced Genomic Technologies, Duke University, Durham, NC

16 6. Departments of Microbiology, Biology, and Molecular Engineering Sciences, University of  
17 Washington, Seattle, WA.

18

19 **Corresponding author email:** [nitin.baliga@isbscience.org](mailto:nitin.baliga@isbscience.org)

20

21

22 **This PDF file includes:**

23 Supplementary Text

24 Figs. S1 to S17

25

26 **Other Supplementary Materials for this manuscript include the following:**

27 Tables S1 to S16

28

29 **Supplementary Text**

30 ***Selection and proliferation of mesenchymal GSCs does not account for changes in PD-***  
31 ***GSC population structure***

32 Given the mounting evidence supporting the ability of GSCs to undergo cell state transitions in  
33 response to drug treatment, exemplified in PMT, it was likely that the shift in the proportion of  
34 molecular subtypes observed in SN520 was due to such a transition. However, the shift in  
35 molecular subtype could have been the result of the selection of a pre-existing subpopulation of  
36 MES cells. To confirm whether changes in population structure occurring in PD-GSCs were due  
37 to non-genetic changes in cell state or drug-induced selection, we performed both theoretical  
38 calculations and DNA quantification to determine the feasibility of a selection process driving the  
39 observed changes in SN520 population structure. Using the population structure and number of  
40 cells collected at each time point, we considered three scenarios for our theoretical calculations:  
41 1) only pre-existing MES cells survived treatment with negligible proliferation, 2) only pre-existing  
42 MES cells survive and proliferate, and 3) assuming selection was the driving force, what cell  
43 doubling time ( $t_d$ ) would be required to produce cell counts observed.

44  
45 We analyzed multiple scenarios under which a change in population structure could occur: *i)*  
46 Selection of MES PD-GSCs, *ii)* selection and proliferation of MES PD-GSCs only, and *iii)*  
47 concurrent proliferation of MES PD-GSCs and death of all non-MES PD-GSCs. In all scenarios,  
48 cell counts and estimated  $t_d$  for SN520 were used (Supplementary Figure S7).

49  
50 In scenario *i)*, the simplest case – we assumed that the initial amount of MES cells at D0 (24,657  
51 cells) remained consistent through the 4-day experiment. As we estimated 537,500 total viable  
52 cells (based on calculated cell concentrations and volumes collected) by the end of the 4-day  
53 pitavastatin treatment, the proportion of MES PD-GSCs would only account for 4.6% of the total  
54 PD-GSC population, which differs tremendously from the 94% proportion present in the surviving  
55 cells (505,421 MES PD-GSCs). Alternatively, had a majority of the non-MES PD-GSCs died  
56 during treatment, it is theoretically possible that the MES subtype could make up 94% of the  
57 surviving cells, if not more. The theoretical final cell counts, however, would not match with  
58 experimental results.

59  
60 In scenario *ii)* we analyzed an extension of scenario *i)* alternative in that it was assumed that all  
61 non-MES PD-GSCs were eliminated by the end of the 4-day treatment and that only MES PD-

62 GSCs grew during this time. To estimate final cell amounts by D4, we assumed exponential  
63 growth, characterized by the following:

64

$$x_f = x_i * 2^n \quad \text{Eqn. 1}$$

65

66 Where  $x_f$  is final number of PD-GSCs,  $x_i$  is the initial number of PD-GSCs, and  $n$  is the number  
67 of doublings that occurred. Here the number of doublings is equivalent to

68

$$n = \frac{\Delta t}{t_d} \quad \text{Eqn. 2}$$

69

70 Where  $\Delta t$  is the duration of the experiment and  $t_d$  is the doubling time. In this case, SN520 had  
71 a doubling time of ~85hrs (Supplementary Figure S7). Based on Eqns. 1 and 2, the total number  
72 of MES PD-GSCs totaled 51,421 cells, which also falls short of the 537,500 cells (505,421 MES  
73 PD-GSCs) at D4.

74

75 In scenario *iii*) we determined what  $t_d$  would be required of the MES cells to match experimental  
76 observations. Based on the initial and final number of MES PD-GSCs, 24,658 and 51,421 cells,  
77 respectively, and a 3.94-day duration time, we found that  $t_d$  of 21.9hr would be required for the  
78 initial number of MES cells to match experimentally measured cell counts and subtype proportions  
79 at D4. This suggests that MES cells experienced an approximate 4-fold decrease in  $t_d$  relative to  
80 the rest of the PD-GSC population, which is highly unlikely. It is important to note that these  
81 theoretical calculations assumed ideal or maximal growth rates for the MES cells. In other words,  
82 despite calculations, which favored MES growth, some other factor or process most likely  
83 contributed to the increase in proportions of MES cells. These results, taken together with the low  
84 number of PD-GSCs in the G2/M phase, based on cell cycle annotation and DNA quantification,  
85 strongly point towards pitavastatin treatment inducing a MES transition in SN520.

86

### 87 ***Differential Expression Gene and Clustering Enrichment Analysis***

88 DEG and enrichment analysis revealed several insights into the cellular response and sequence  
89 of responses for each PD-GSC. As SN520 expressed a clear coordinated response during  
90 treatment, we provide additional details on the results from the DEG and enrichment analyses.

91

92 SN520 Clustering & Enrichment. Vehicle control cells of SN520 from all time points were evenly  
93 distributed across eight Leiden clusters ( $cl_{520-0}$ ,  $cl_{520-1}$ ,  $cl_{520-3}$ ,  $cl_{520-5}$ ,  $cl_{520-8}$ ,  $cl_{520-10}$ , and  $cl_{520-11}$ ), a majority of which were enriched for genes of oxidative phosphorylation (OXPHOS) and  
94 growth-related hallmark pathways like E2F targets and G2M checkpoint (Figure 3E, table S2).  
95 Together these findings suggested that, in the absence of drug treatment, SN520 cells proliferated  
96 using OXPHOS as a mode of energy production (96, 97). By contrast, six clusters ( $cl_{520-2}$ ,  $cl_{520-4}$ ,  $cl_{520-6}$ ,  $cl_{520-7}$ ,  $cl_{520-12}$ , and  $cl_{520-13}$ ) were predominantly enriched with cells from a single  
97 pitavastatin-treatment time point. In fact, Leiden clusters could be organized longitudinally based  
98 on the relative proportions of drug-treated cells from each day to recreate the likely sequence of  
99 events triggered by pitavastatin (43) (Figure 3C). For instance, temporal ordering of D2 and D3  
100 pitavastatin-treated cell clusters ( $cl_{520-2} \rightarrow cl_{520-9} \rightarrow cl_{520-4} \rightarrow cl_{520-7}$ ) revealed sequential  
101 differential regulation of cholesterol homeostasis, fatty acid metabolism, MTORC1 signaling, a  
102 regulator of lipid formation (98), and cholesterol biosynthesis and maintenance. This sequential  
103 differential regulation of functions across D2 and D3 cells was consistent with the mechanism of  
104 action of pitavastatin (i.e., inhibition of cholesterol biosynthesis). In addition, enrichment of  
105 apoptosis ( $cl_{520-4}$ ,  $cl_{520-6}$ , and  $cl_{520-7}$ ) and TNF $\alpha$  signaling via NF $\kappa$ B ( $cl_{520-6}$  and  $cl_{520-7}$ ), with  
106 progressively higher proportions of D4 pitavastatin-treated cells suggested a mechanism of killing  
107 by pitavastatin. Specifically, the findings showed that on D4, pitavastatin treatment had induced  
108 TNF- $\alpha$  signaling, which activated apoptosis within a subpopulation of SN520 GSCs and was  
109 consistent with both annexin V cytometry results (Supplementary Figure S2) and timing of  
110 maximal cell death rate (Figure 1B). Further, the high proportion of D4 pitavastatin-treated cells  
111 in  $cl_{520-6}$  and  $cl_{520-7}$  indicated that the cytotoxic effects resulted in the upregulation of cellular  
112 stress responses including unfolded protein response, protein secretion, and p53 pathway.

115  
116 As described in the main text,  $cl_{520-6}$ ,  $cl_{520-7}$ , and  $cl_{520-13}$ , which were cell clusters enriched with  
117 D4 pitavastatin-treated cells, were enriched for both apoptosis- and EMT-associated genes and  
118 contained cells from time points that aligned with the timing of the MES transition (Figure 2C, D).  
119 These findings were consistent with previous studies that reported TGF- $\beta$  can simultaneously  
120 induce apoptosis and EMT during tumor formation and progression. Cell fate correlated with cell-  
121 cycle phase, with tumor cells in G2/M phase undergoing apoptosis and those in G1/S phase  
122 undergoing EMT (37, 38). As cells in  $cl_{520-6}$ ,  $cl_{520-7}$ , and  $cl_{520-13}$  were in G1/S phase, explaining  
123 how surviving SN520 PD-GSCs might have escaped apoptosis – by transitioning into the MES  
124 subtype (Supplementary Figure S8). Finally, a majority of Leiden clusters did upregulate genes  
125 associated with autophagy (table S2), which aligns with previously reported mechanisms of

126 pitavastatin in glioma cells (30) and suggests that autophagy played a role in the response of  
127 SN520.

128

### 129 ***TF-TF network modeling and ODE simulation motivation***

130 As characterization of drug response at single-cell resolution strongly supported the notion that  
131 the PD-GSCs underwent drug-induced transitions, we sought to understand how transcriptional  
132 regulatory mechanisms could govern the phenotypic heterogeneity observed within and across  
133 the two PD-GSC populations. Thus, we investigated the dynamical behavior of the underlying  
134 transcriptional regulatory networks from which multiple steady states, i.e., phenotypic states,  
135 emerge. The TFs comprising each core network were all associated with response-relevant  
136 processes (table S13) (26, 36, 44, 99–149). Using the core TF-TF networks (Figure 4E, F), we  
137 applied a previously developed algorithm known as random circuit perturbation (RACIPE) (63,  
138 64), originally designed to model EMT circuits in cell development and other cancers (65–67).  
139 Briefly, RACIPE generates an ensemble of ordinary differential equation (ODE) models based on  
140 associated chemical rate equations with distinct, random kinetic parameter sets. Because distinct,  
141 random kinetic parameters sets are used, this avoids the issue of parameter identification for  
142 kinetic-based ODE models. From the ensemble of models, we analyzed the resulting distribution  
143 of steady states and identified robust phenotypes supported by the core TF network. Previous  
144 applications have demonstrated that this ensemble modeling/simulation approach was able to  
145 recapitulate established cell states in the context of EMT-associated metastasis, B-cell  
146 lymphopoiesis, and small cell lung cancer (62, 63, 150, 151).

147

### 148 ***TF-TF network validation for SN520 and SN503***

149 To test the predictive capabilities of the TF-TF network topologies, we evaluated how similar or  
150 dissimilar the simulated states were to experimental data when each network was initialized using  
151 untreated (D0) data for each PD-GSC, respectively. Hierarchical clustering of the simulated  
152 steady states for both SN520 and SN503 resulted in four main clusters, i.e., “robust” steady states  
153 for each PD-GSC (Fig 6C, E – dendrogram of simulated states). We then determined pairwise  
154 cosine similarity values derived from pairwise comparisons of *i*) PD-GSCs to one another within  
155 each hierarchical cluster and *ii*) simulated states to PD-GSCs within hierarchical clusters. Of the  
156 latter comparisons, when clusters of simulated states were similar to experimental clusters, the  
157 distributions of cosine similarity values were significantly higher than distributions based on  
158 comparisons in which TF gene expression was randomly permuted (Supplementary Figure S12).

159

160 To assess the statistical significance of the network topologies, we also performed simulations in  
161 which nodes and edges were randomly assigned such that the number of nodes and connections  
162 within each permuted network is identical to that of the original corresponding network. Using the  
163 same untreated (D0) TF expression values as initial conditions, we performed RACIPE  
164 simulations using 1,000 permuted networks, where each permuted network was used to run  
165 1,000 randomly selected parameter sets with a randomly selected untreated (D0) TF expression  
166 profile. The resulting 1e6 simulated states for each PD-GSC were then compared to the TF  
167 expression profiles of untreated and pitavastatin-treated cells to create a null distribution of cosine  
168 similarity values. Using this null distribution as a basis of comparison, we found that cosine  
169 similarity values derived from the original TF-TF network topologies were statistically significant  
170 (SN520 p-value < 1e-16, SN503 p-value < 1e-16, Supplementary Figure S12).

171

### 172 ***Assessment of pitavastatin as an HDAC-inhibitor***

173 Prior reports have suggested that statins affect gene expression epigenetically through the  
174 inhibition of histone deacetylases (HDACs). Lin et al. (152) and Mohammadzadeh et al. (153)  
175 reported potential role of statins in histone modification. However, pitavastatin was not explicitly  
176 included in their analyses. In contrast, Bridgeman et al. reported contrasting findings, stating that  
177 statins did not directly inhibit the activity of major epigenetic-modifying enzymes including HDAC  
178 (154).

179

180 To clarify these the contradictory findings, we investigated whether the effects of pitavastatin were  
181 mediated through HDACi. Specifically, we determined if signatures of HDAC inhibition (HDACi)  
182 were reflected in SN520 and SN503. We leveraged a recent study by Rampazzo et al. (155) that  
183 had reported differentially expressed genes (DEGs) in primary GSC lines treated with HDACi. Out  
184 of the 1,112 HDACi-induced DEGs, only a small number of genes were also upregulated by  
185 pitavastatin treatment in SN520 (responder) on D2 – D3 (28 and 44 genes, respectively, table  
186 S15). In SN503 (non-responder), there was no significant overlap between HDACi-induced and  
187 pitavastatin-upregulated DEGs (table S15). Moreover, phenotypic effects of pitavastatin on  
188 SN520 and SN503 were also distinct from those HDACi-induced effects previously reported.  
189 Specifically, Rampazzo et al. reported that HDACi decreased WNT signaling, which resulted in  
190 repression of stem-like phenotype of GSCs and induced transition of GSCs to a neuronal state.  
191 In stark contrast, we observed that pitavastatin treatment led to increased WNT signaling, and  
192 drove PMT in SN520 (Figure 4). In addition, pitavastatin treatment did not cause changes in stem  
193 cell-like phenotypes in either SN520 or SN503 as expression of at least one stem cell surface

194 protein marker, CD133 or CD44 was maintained in both PD-GSCs throughout treatment (Figures  
195 2E, F). Together, these findings cast significant doubt that gene expression changes induced by  
196 pitavastatin in SN520 and SN503 were mediated by HDACi.

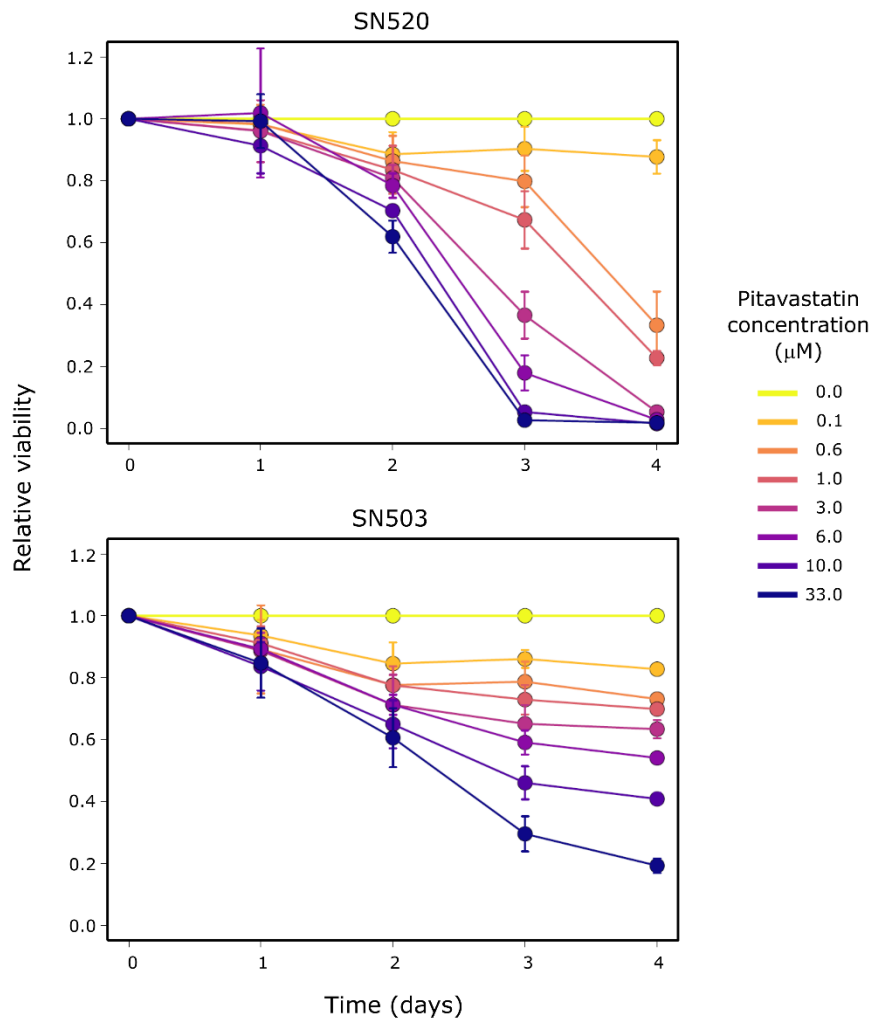

197

198

199 **Fig. S1. Pitavastatin-induced kill kinetics in SN520 and SN503.** Plots of mean cell viability  
 200 during pitavastatin treatment for SN520 (top) and SN503 (bottom). Each series of relative viability  
 201 values corresponds to a different pitavastatin concentration. Relative viability was calculated with  
 202 respect to the untreated (vehicle-normalized, pitavastatin = 0.0 $\mu\text{M}$ ) condition. Plotted values are  
 203 mean viability values (N = 3) and error bars represent  $\pm 2x$  standard deviation.

204



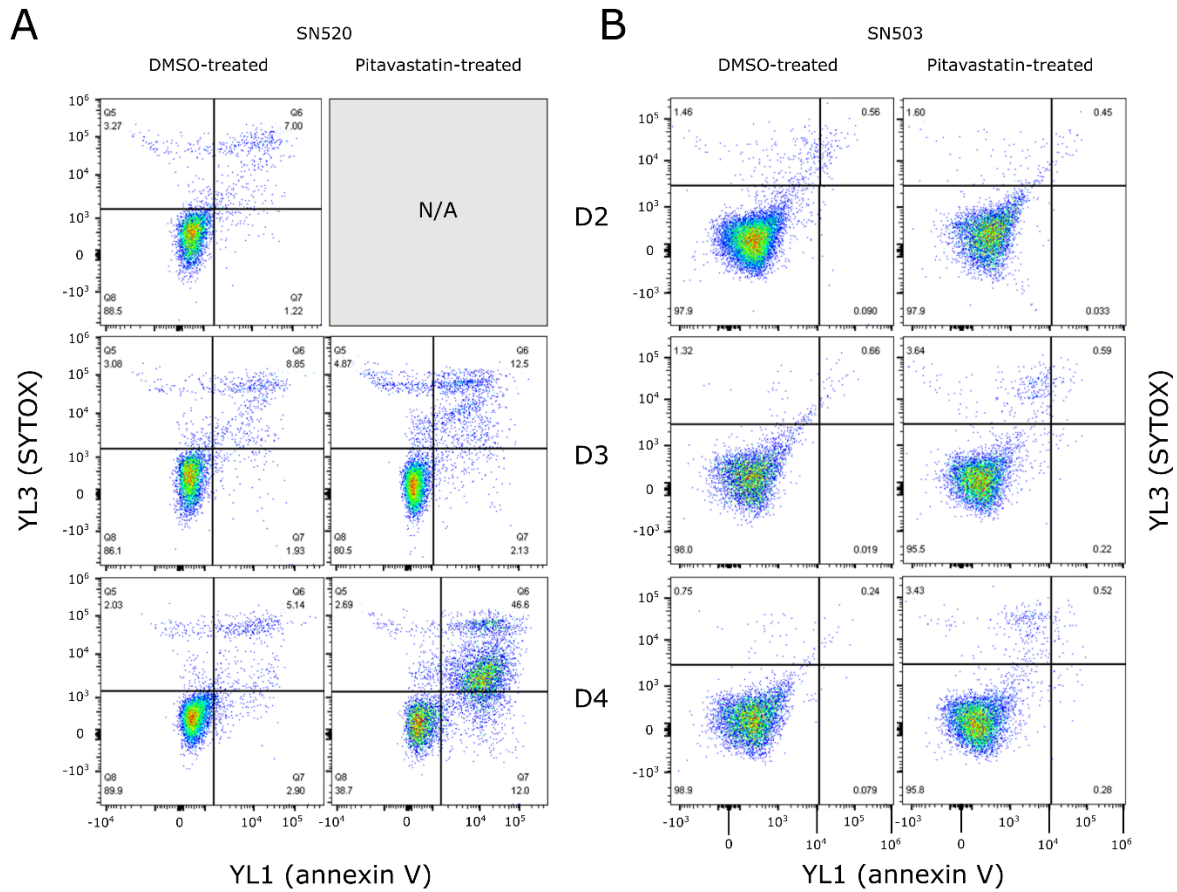

205

206 **Fig. S2. Flow cytometry analysis of apoptosis and cell death.** Dot plots of cells assessing cell  
 207 death (SYTOX) and apoptotic markers (annexin V) for **(A)** SN520 and **(B)** SN503. Gating was  
 208 based on an unstained control and heat-inactivated/live cell (50:50) mixed control sample for each  
 209 PD-GSC. Heat inactivation consisted of incubating cells in 60°C water bath for 15 minutes, with  
 210 a small sample being inspected post incubation under microscope to ensure that inactivated cells  
 211 were not completely lysed. Due to sample-limitations in D2 pitavastatin treated samples, flow  
 212 cytometry assessment of cell-death and apoptosis was not performed (N/A plot).

213

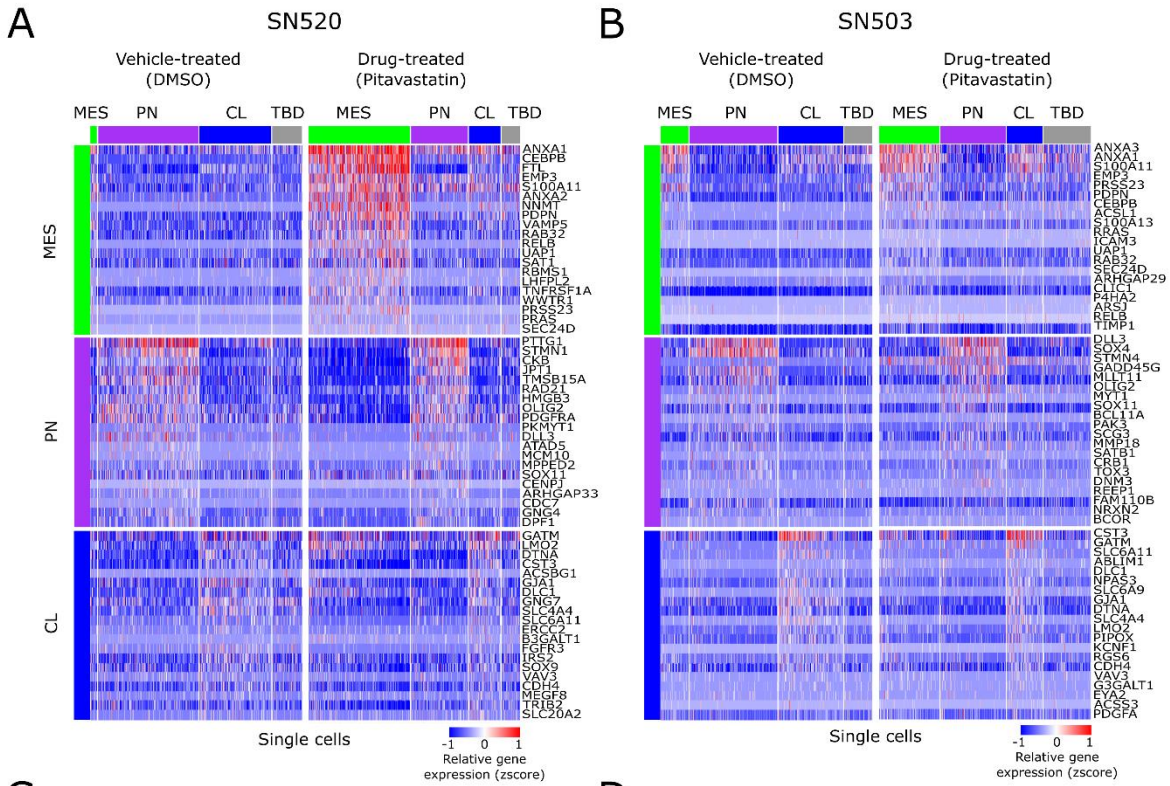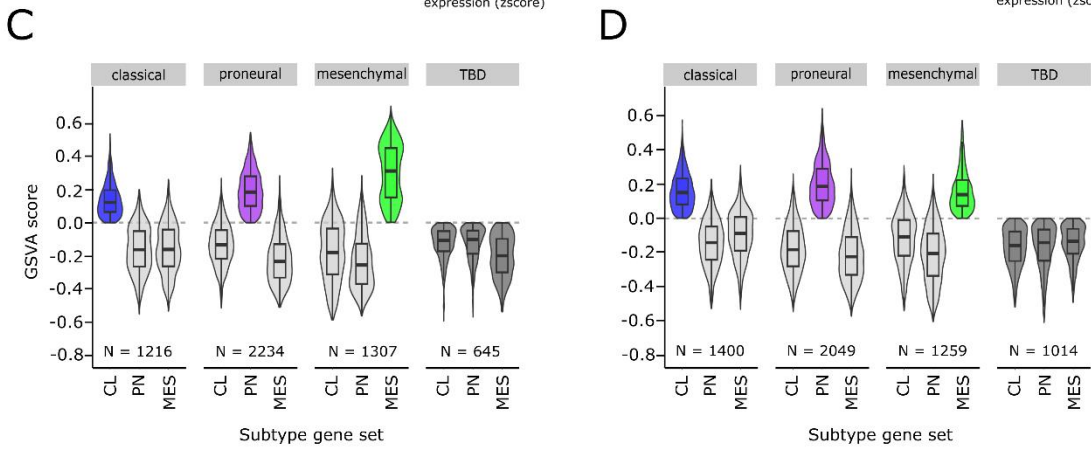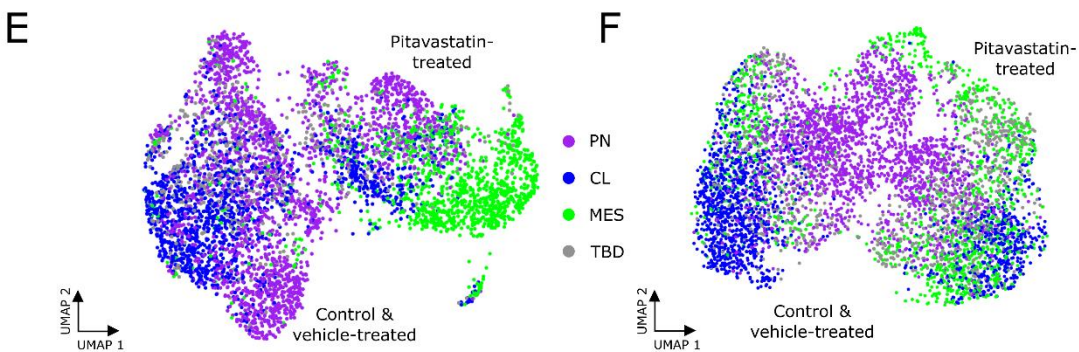

215 **Fig. S3. Defining GBM molecular subtypes via gene expression.** Heatmaps of subset of 20  
216 genes used to define GBM molecular subtypes for **(A)** SN520 and **(B)** SN503 cells. Violin/boxplots  
217 of GSVA enrichment scores (ES) for CL, PN, and MES molecular subtypes determined for cells.  
218 Clusters of violin/boxplots correspond to molecular subtype scores for cells categorized to each  
219 subtype for **(C)** SN520 and **(D)** SN503. Numbers of single cells belonging to each subtype are  
220 listed underneath violin/boxplots. Those cells having a negative ES for all three subtypes  
221 remained undefined (TBD - grey). UMAP plots show PD-GSCs annotated according to enriched  
222 molecular subtype for **(E)** SN520 and **(F)** SN503.  
223

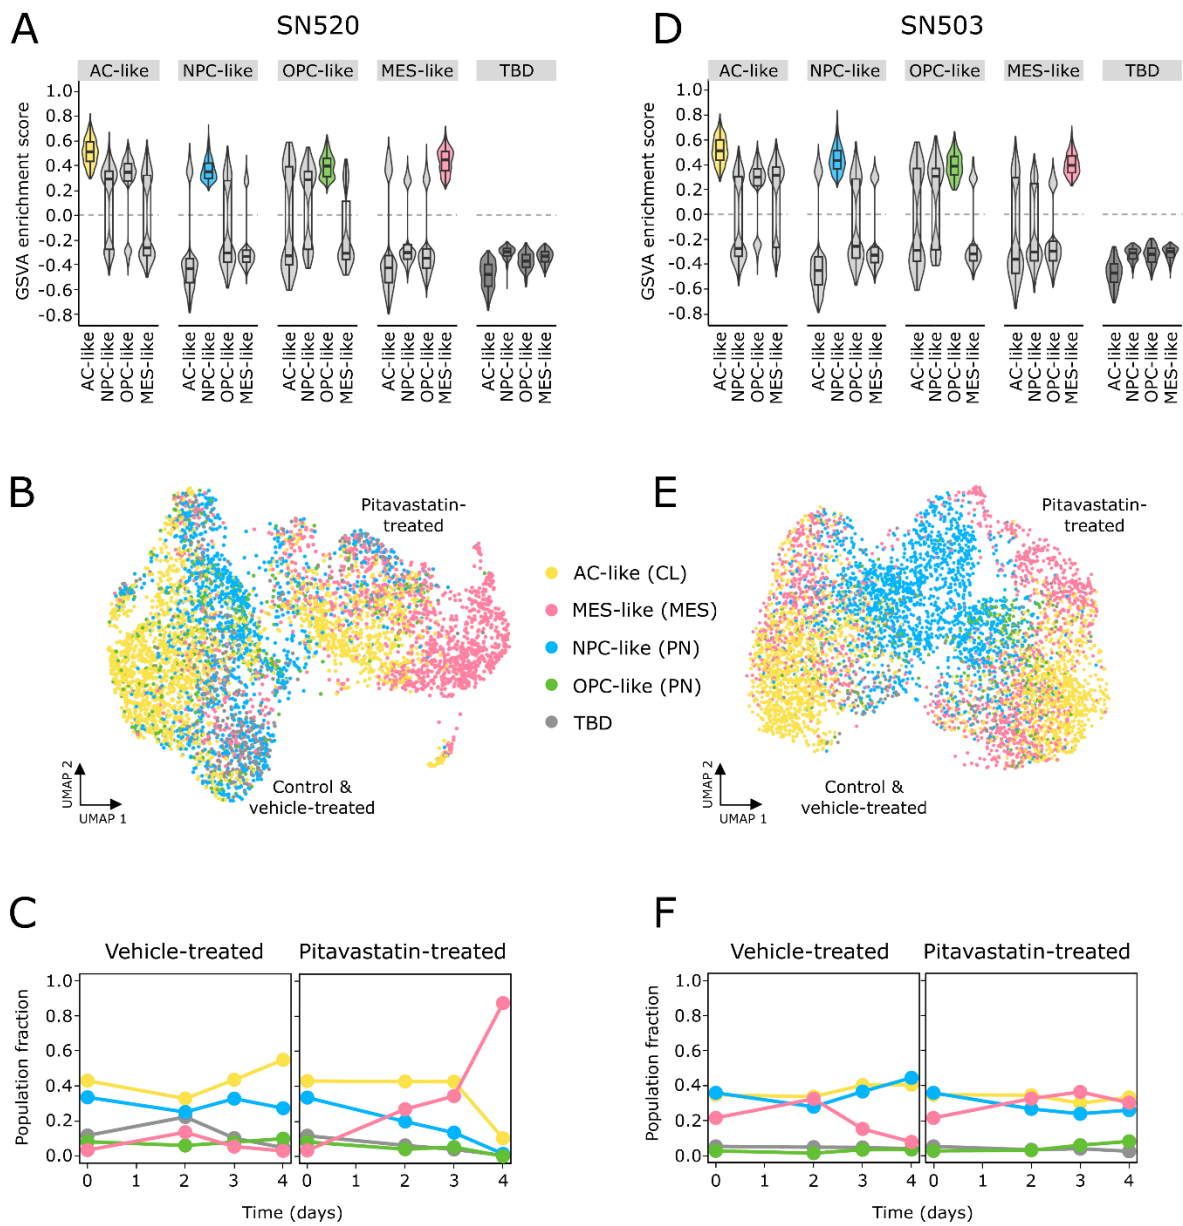

224

225 **Fig. S4. Cell state annotation of SN520 and SN503.** (A) Violin/boxplots of GSVA enrichment  
 226 scores (ES) for AC-like, NPC-like, OPC-like, and MES-like cell states (9) for SN520 cells. (B)  
 227 UMAP plots of PD-GSCs annotated according to enriched cell states. (C) Proportions of cell  
 228 states across treatment and time points for SN520. (D-F) Corresponding plots for SN503. Color  
 229 annotation for (E, F) are identical to that in (B, C).

230

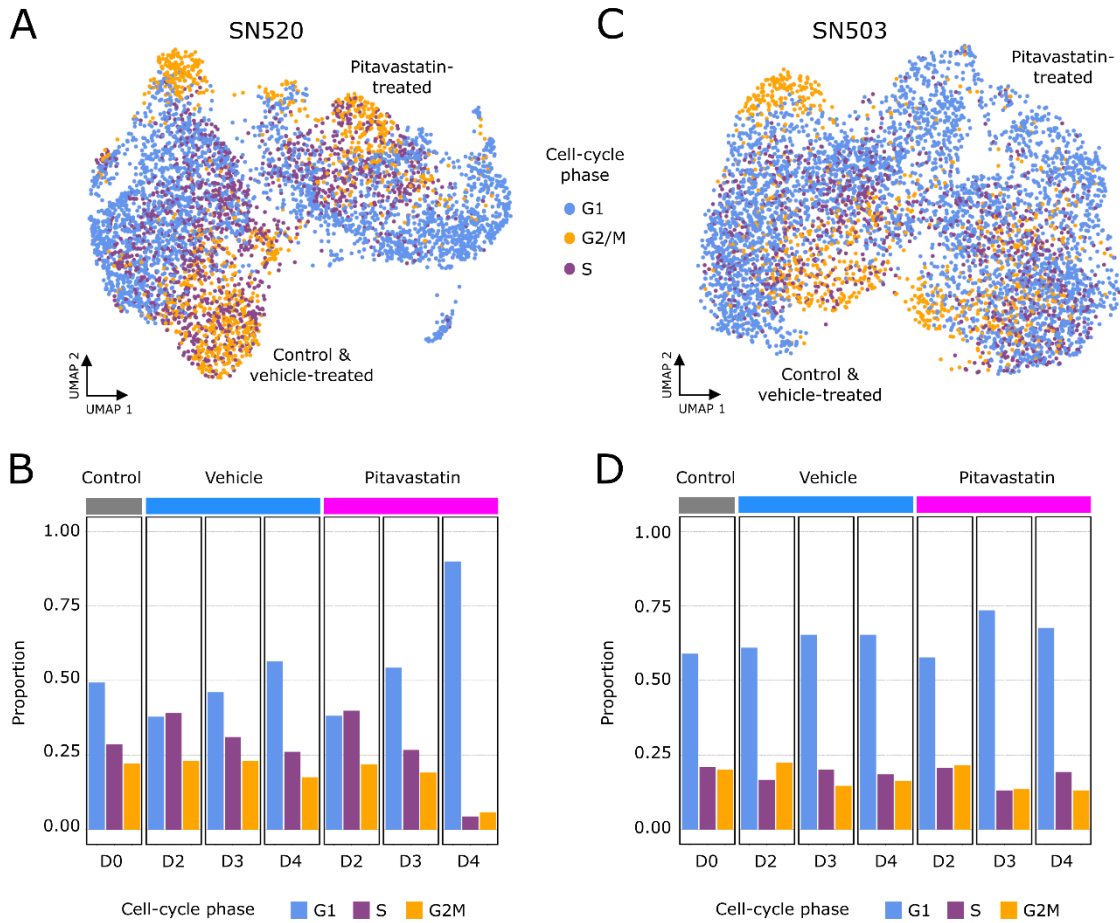

231

232 **Fig. S5. Cell cycle phase breakdown of SN520 and SN503. (A)** UMAP plot of SN520, similar  
 233 to Figure 2A, annotated for cell cycle phase for each cell. **(B)** Proportions of cells in each cell  
 234 cycle phase within each treatment condition for SN520. **(C)** UMAP plot of SN503 annotated for  
 235 cell cycle phase for each cell. **(D)** Proportions of cells in each cell cycle phase within each  
 236 treatment condition for SN503.

237

**A**

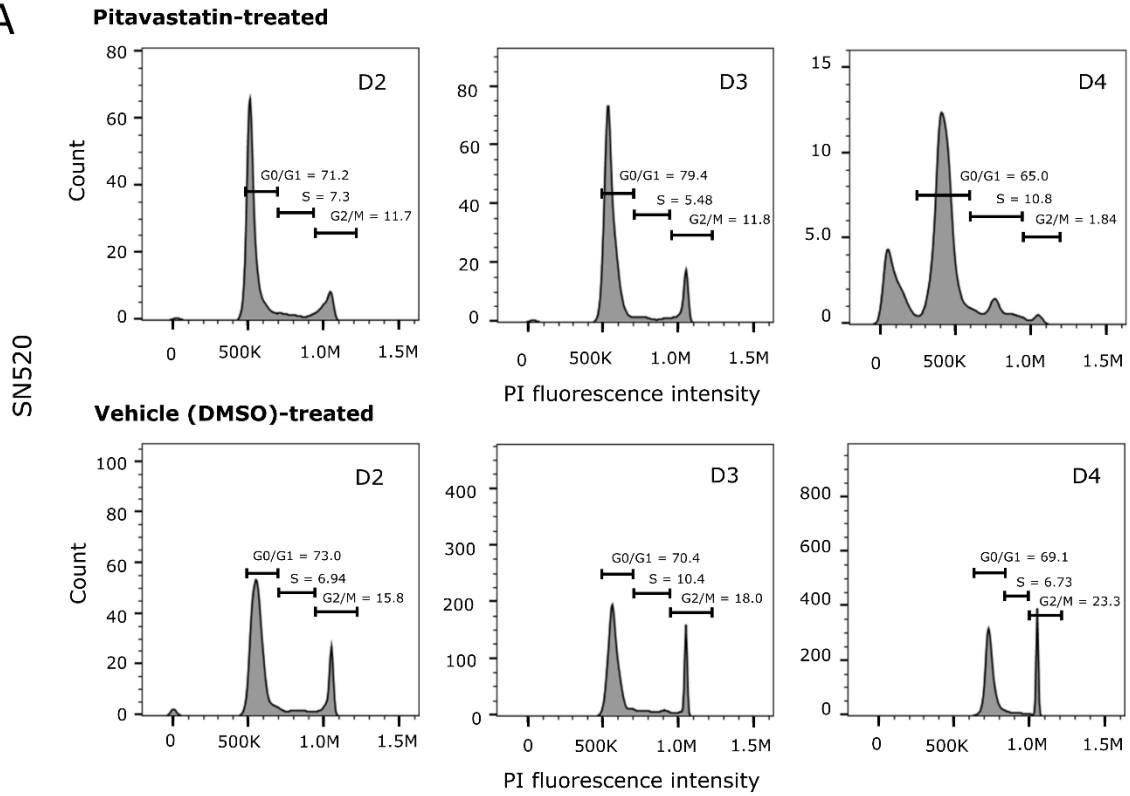

**B**

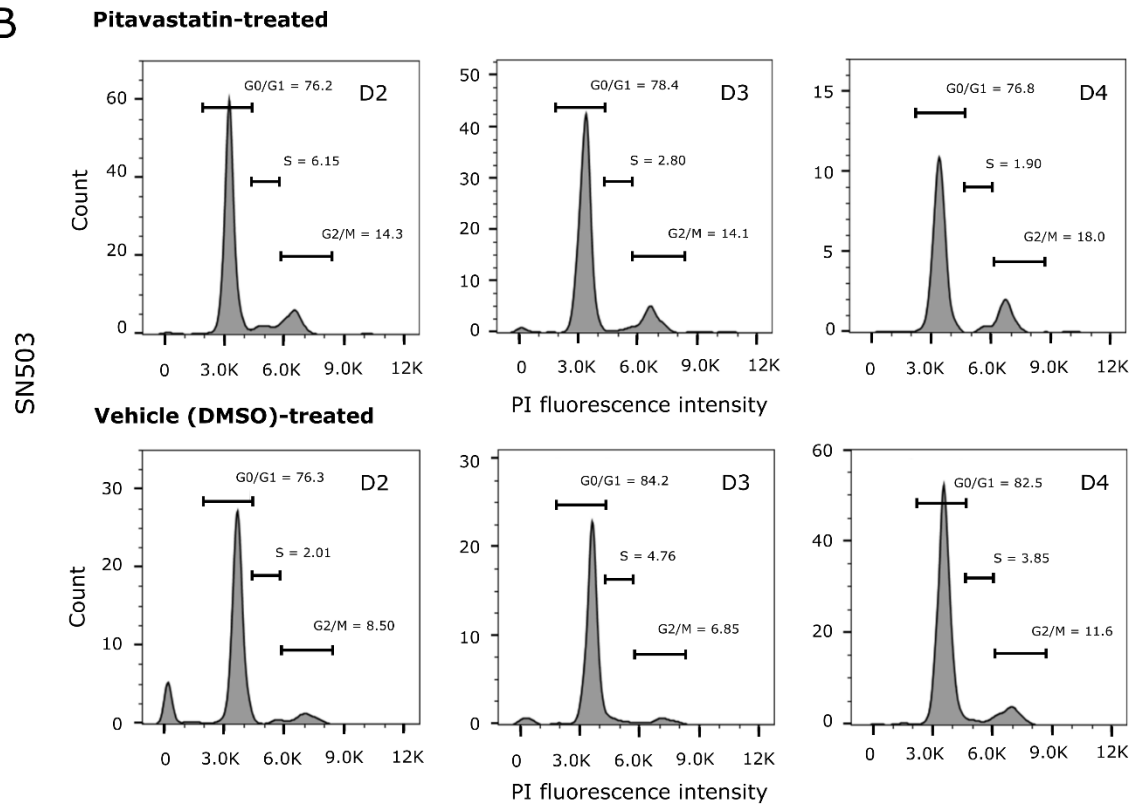

239 **Fig. S6. DNA quantification throughout treatments.** Density plots of fluorescent signals  
240 generated from cells stained with propidium iodide (PI) throughout pitavastatin- (top) and vehicle-  
241 treatment (bottom) for **(A)** SN520 and **(B)** SN503. Portions of the density plots representative of  
242 specific cell cycle phases have been labeled, along with percentages of cells within each phase.  
243

A

| PD-GSC ID | Inoculation density (cells) | Passage/harvest density (cells) | Growth duration (days) | Substrate | Estimated $t_d$ (hrs) |
|-----------|-----------------------------|---------------------------------|------------------------|-----------|-----------------------|
| SN520     | 4.36E+05                    | 7.56E+06                        | 14                     | T75 flask | 81.62                 |
| SN520     | 4.36E+05                    | 7.48E+06                        | 14                     | T75 flask | 81.93                 |
| SN520     | 4.36E+05                    | 5.94E+06                        | 14                     | T75 flask | 89.17                 |
| SN503     | 5.68E+05                    | 5.58E+06                        | 13                     | T75 flask | 94.65                 |
| SN503     | 5.68E+05                    | 4.22E+06                        | 13                     | T75 flask | 107.79                |
| SN503     | 5.68E+05                    | 4.40E+06                        | 13                     | T75 flask | 105.59                |

|       | mean $t_d$ (hrs) |
|-------|------------------|
| SN520 | 84.24            |
| SN503 | 102.68           |

|       | Percent MES | Total viable cells (D4) | Total MES cells (D4) |
|-------|-------------|-------------------------|----------------------|
| SN520 | 94.03%      | 537,500                 | 505,421              |

B

**Scenario i**

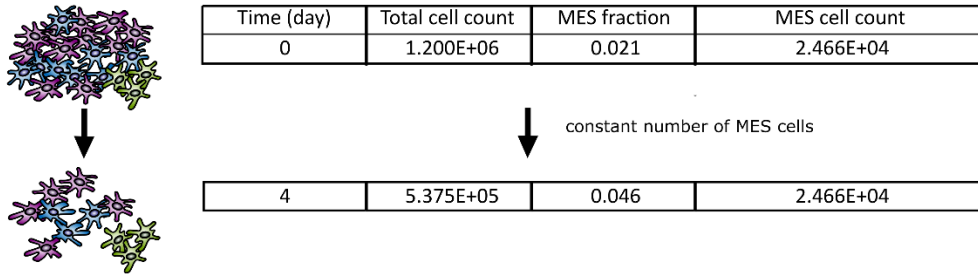

**Scenario ii**

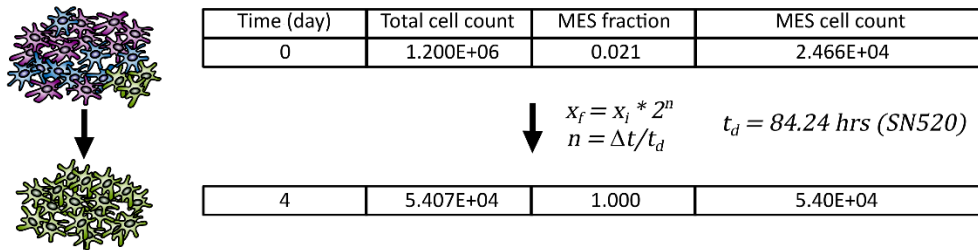

**Scenario iii**

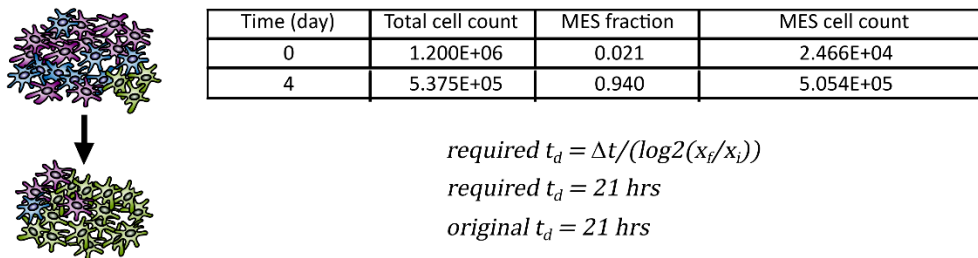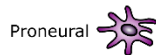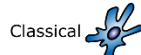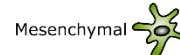



245 **Fig. S7. Theoretical calculations corroborate PMT rather than selection. (A)** Summary of cell  
246 counts (top table) used to determine doubling times ( $t_d$ ) for SN520 and SN503 (middle table).  
247 Summary of total cell counts and estimated D4 MES cell counts for SN520 at D4 are listed in  
248 bottom table. **(B)** Calculations supporting three scenarios that potentially explain the increase in  
249 the proportion of MES cells within SN520. Scenario *i*) assumes a selection of pre-existing MES  
250 PD-GSCs. Scenario *ii*) assumes exponential growth of MES cells only with a  $t_d$  based on (A).  
251 Finally, scenario *iii*) assumes exponential growth of MES cells, but determines a  $t_d$  that would  
252 enable MES growth to match final SN520 cell counts on the fourth day of pitavastatin treatment.  
253 The corresponding  $t_d$  required to achieve a final MES cell count is listed.  
254

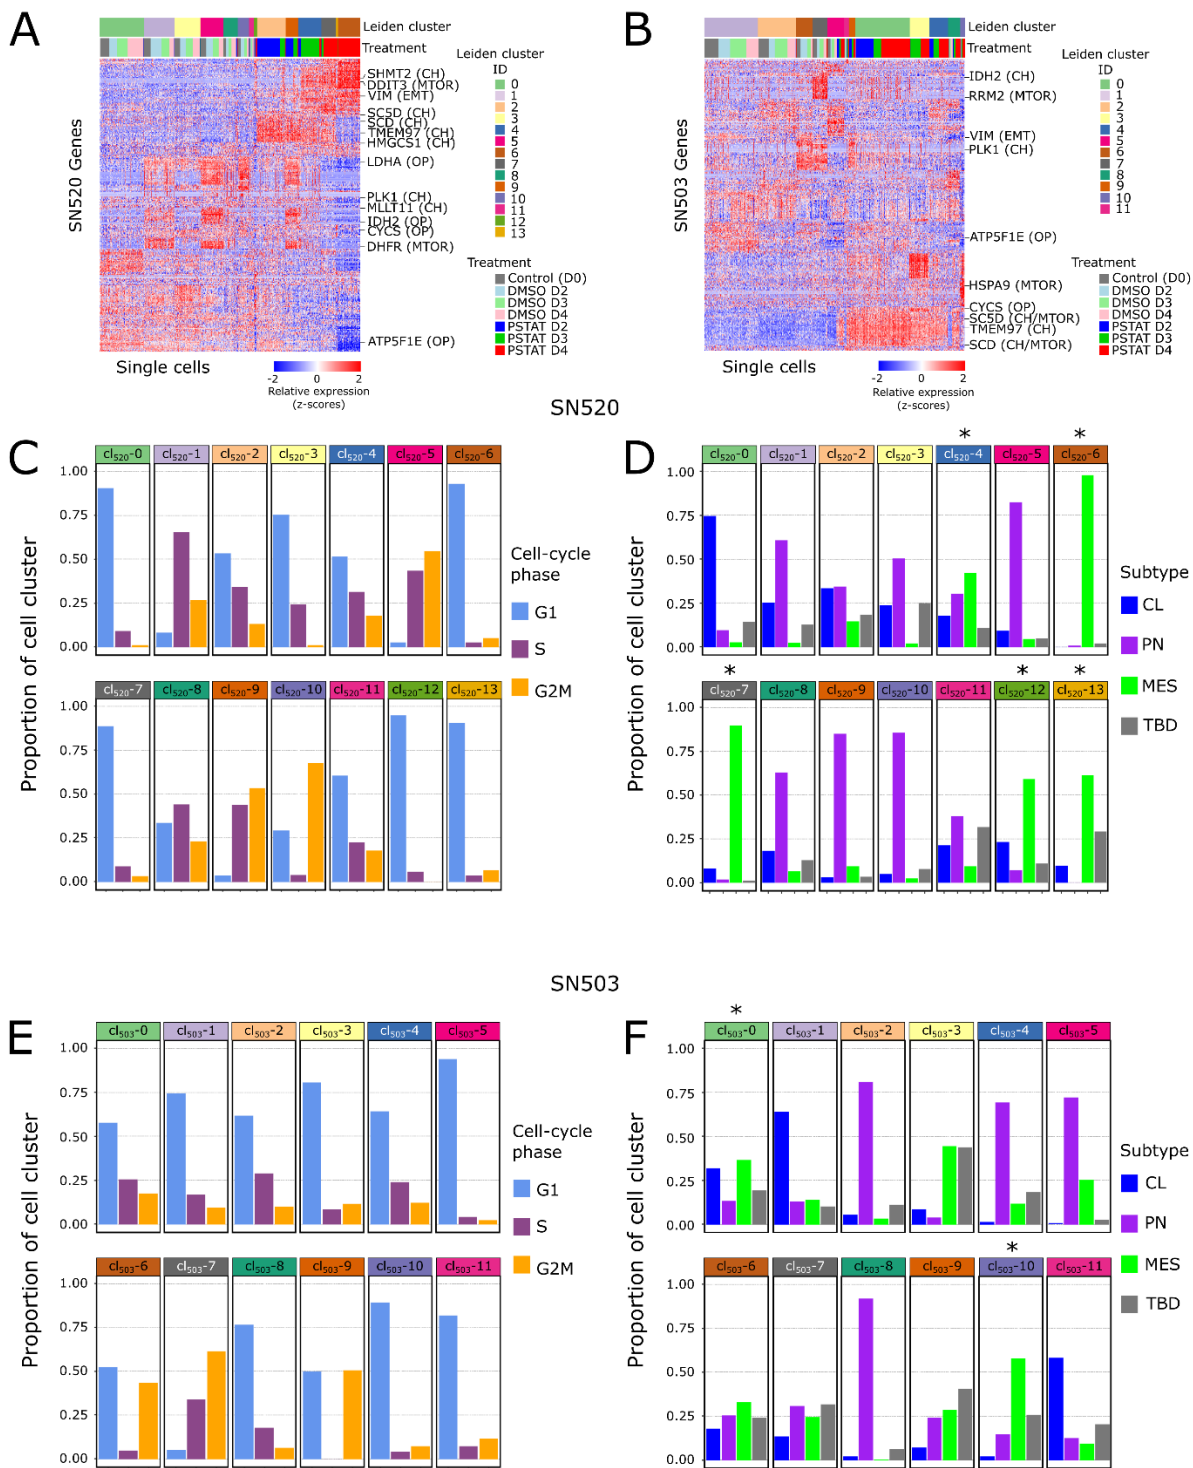

255

256 **Fig. S8. Leiden cell cluster composition (DEGs, cell cycle phase, and molecular subtypes).**

257 **(A)** Heatmap of the top upregulated DEGs, based on FDR values, across the Louvain cell clusters

258 **(c)** identified in vehicle-control- and pitavastatin-treated cells for **(A)** SN520 and **(B)** SN503.

259 Labeled genes are representative members of various enriched hallmark gene sets (CH =  
260 cholesterol homeostasis, OP = oxidative phosphorylation, MTOR = MTORC1 signaling, EMT =  
261 epithelial-to-mesenchymal transition). Proportions of cells in each cell cycle phase or GBM  
262 molecular subtype within each Louvain cluster for SN520 (**C, D**), and SN503 (**E, F**), respectively.  
263 Asterisks indicate which Louvain cell clusters were enriched for apoptotic gene signatures (Figure  
264 3E).  
265

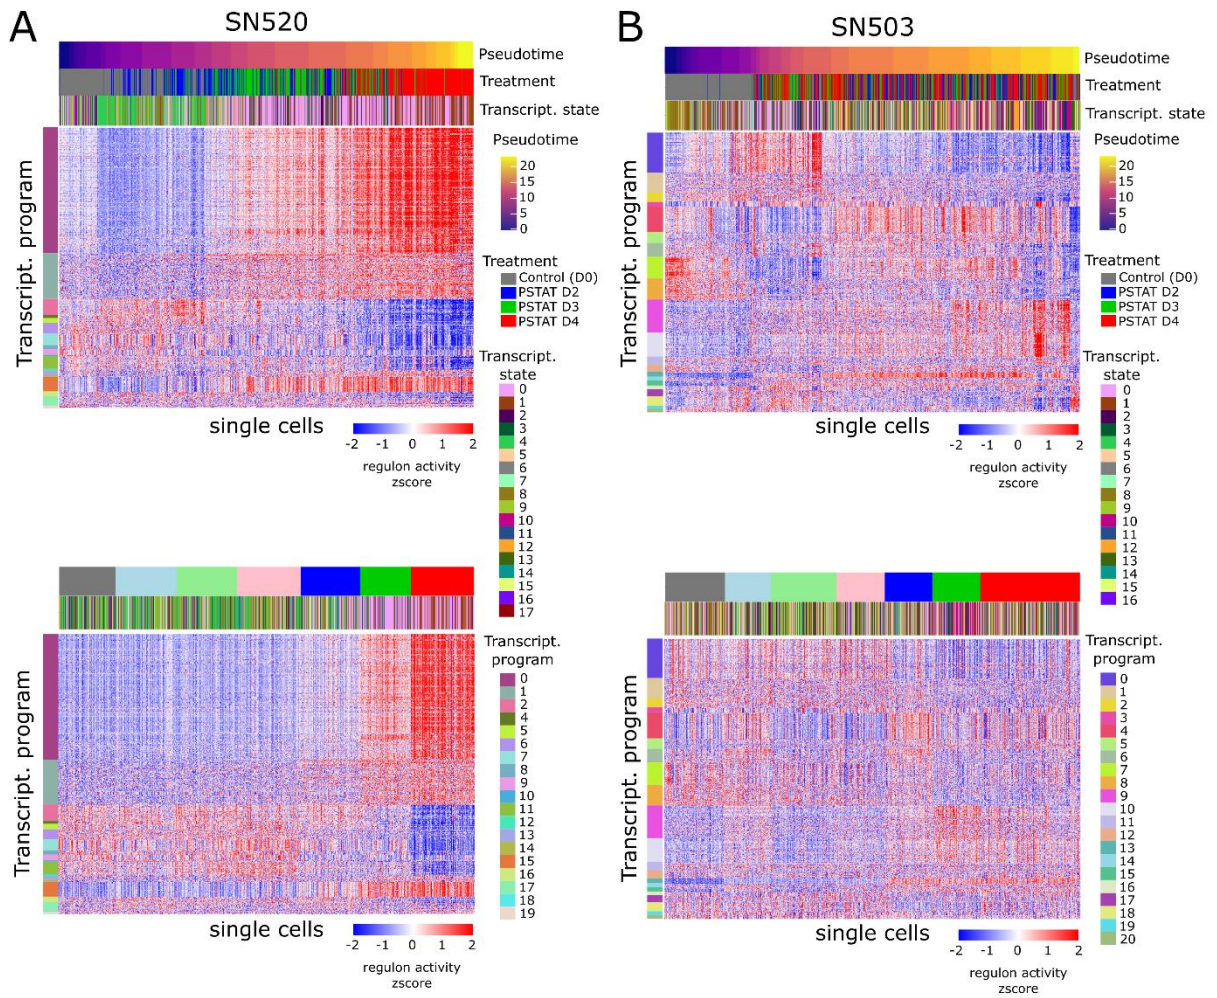

266

267 **Fig. S9. SN520 and SN503 regulon activities.** Heatmaps of eigengene values, i.e., regulon  
 268 activities and transcriptional programs for **(A)** SN520 and **(B)** SN503. Top row of heatmaps show  
 269 regulon activities in cells rearranged according to corresponding pseudotime. Bottom row of  
 270 heatmaps include cells rearranged with respect to experimental treatment. Top color bars  
 271 represent pseudotime, treatment, and MINER3-inferred transcriptional state.

272

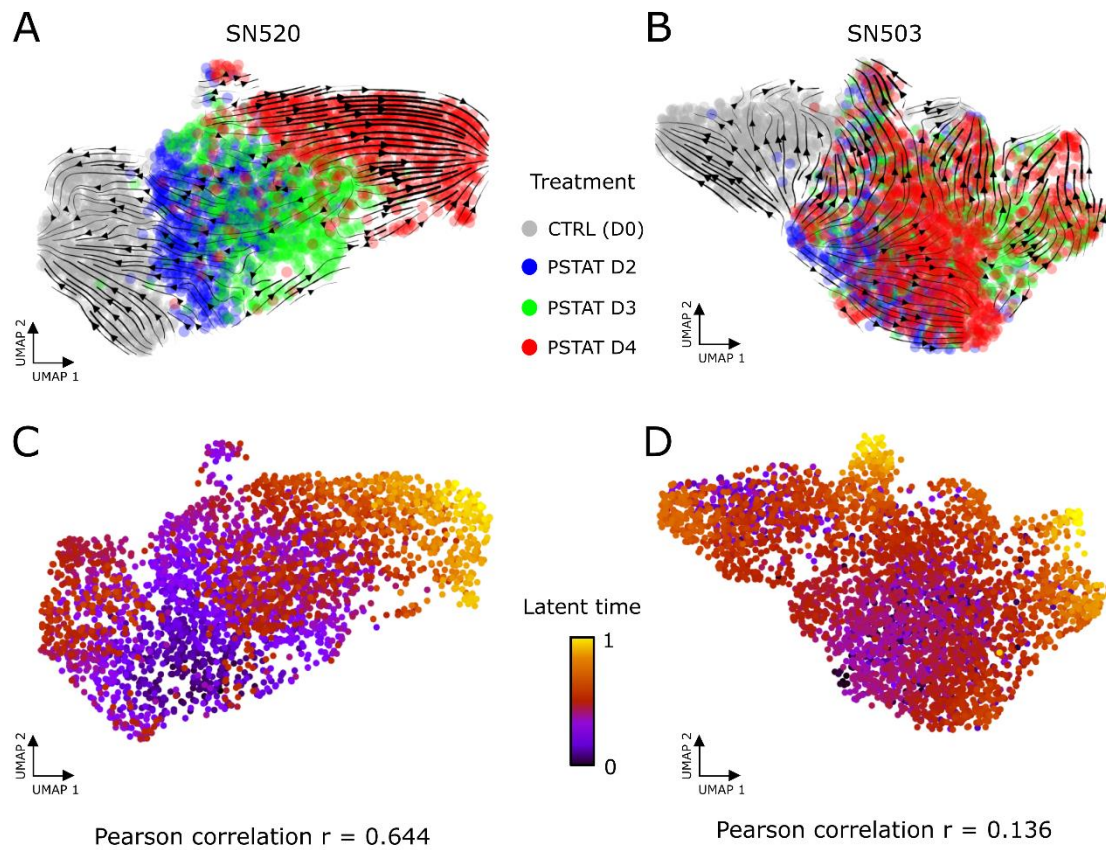

273

274 **Fig. S10. scVelo analysis. (A – B)** RNA velocity and **(C – D)** latent times for SN520 and SN503,  
 275 respectively. Pearson correlations indicate correlation between latent times and experimental  
 276 timing across D2 – D4 (control samples excluded).

277

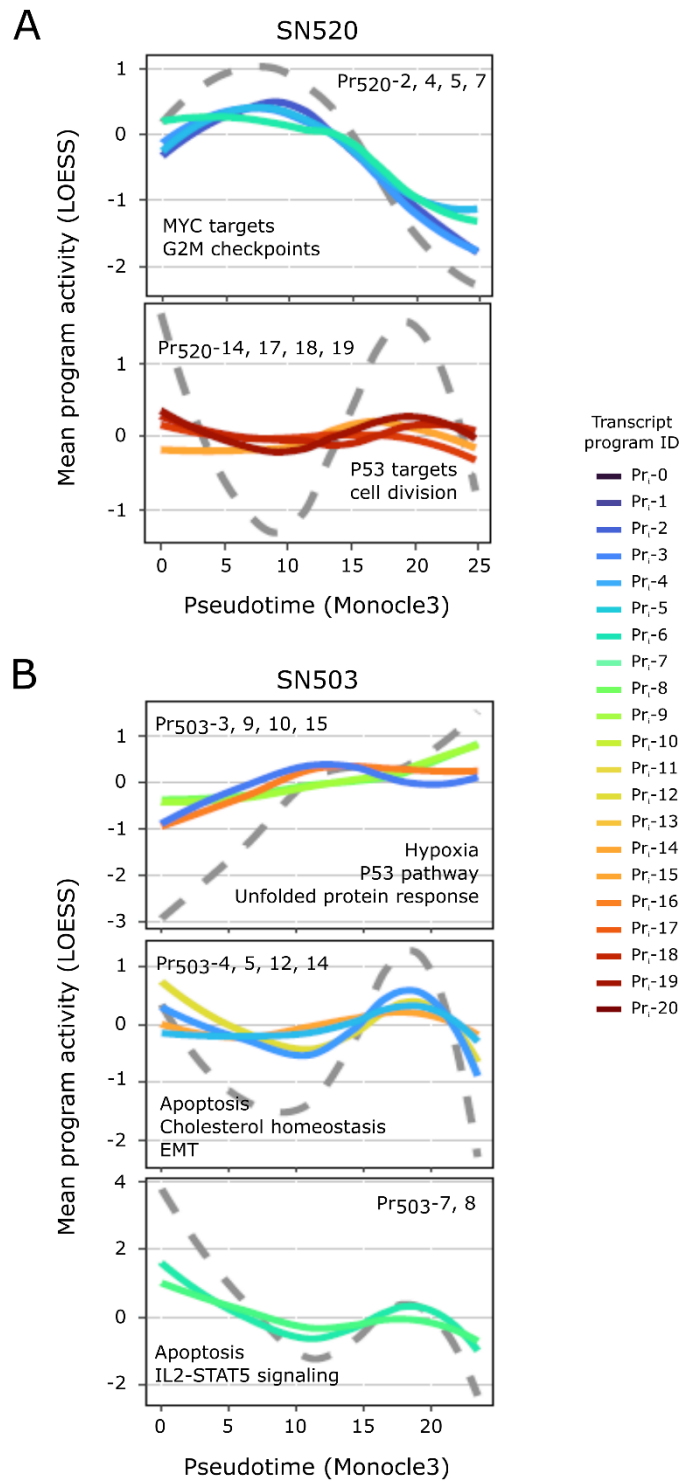

278

279 **Fig. S11. Transcriptional program activity dynamics.** Activity profiles of remaining  
 280 transcriptional programs not included in main Figure 5D for **(A)** SN520 and **(B)** SN503. Programs  
 281 were clustered together based on their LOESS regressed activity profiles with respect to

282 pseudotime. Dashed grey lines represent the average shape of regression profiles for each  
283 program cluster. Representative hallmark gene sets enriched within programs are included within  
284 each plot.  
285





295 Boxplots for SYGNAL-503. Note that multiple simulated states ( $SS_{503-2}$  and  $SS_{503-4}$ ) showed  
296 similarities to  $ES_{503-3}$ . **(C)** Heatmap of mean relative expression (z-score) of TFs across cells  
297 within each experimental state ( $ES_{520}$ ) and simulated state ( $SS_{520}$ ) for SN520, states (columns)  
298 are hierarchically clustered. Color bars on top indicate states and data type (grey – simulation or  
299 black – experimental data). PCA plot of simulated states from SYGNAL-520 below the heatmap  
300 is included for reference. **(D)** Corresponding heatmap of mean relative expression (z-score) of  
301 TFs and PCA plot for SN503. **(E)** Heatmap (left) of mean relative expression for TFs in  
302 experimental states and subset of simulations from SYGNAL-503 in which the input expression  
303 value for ARID5A, MEOX2, and MAFF are high (normalized expression > 1). States (columns)  
304 are hierarchically clustered. Color bar above indicates cell states being compared. Adjacent  
305 heatmap (right) shows pairwise cosine similarity values of mean relative expression profiles of  
306 experimental and simulated states that have high levels of ARID5A, MEOX2, and MAFF. Color  
307 bars indicate cell states. **(F)** Dot plot of TFs rank-ordered based on their importance in classifying  
308 experimental states for SN503 using random forest analysis.  
309

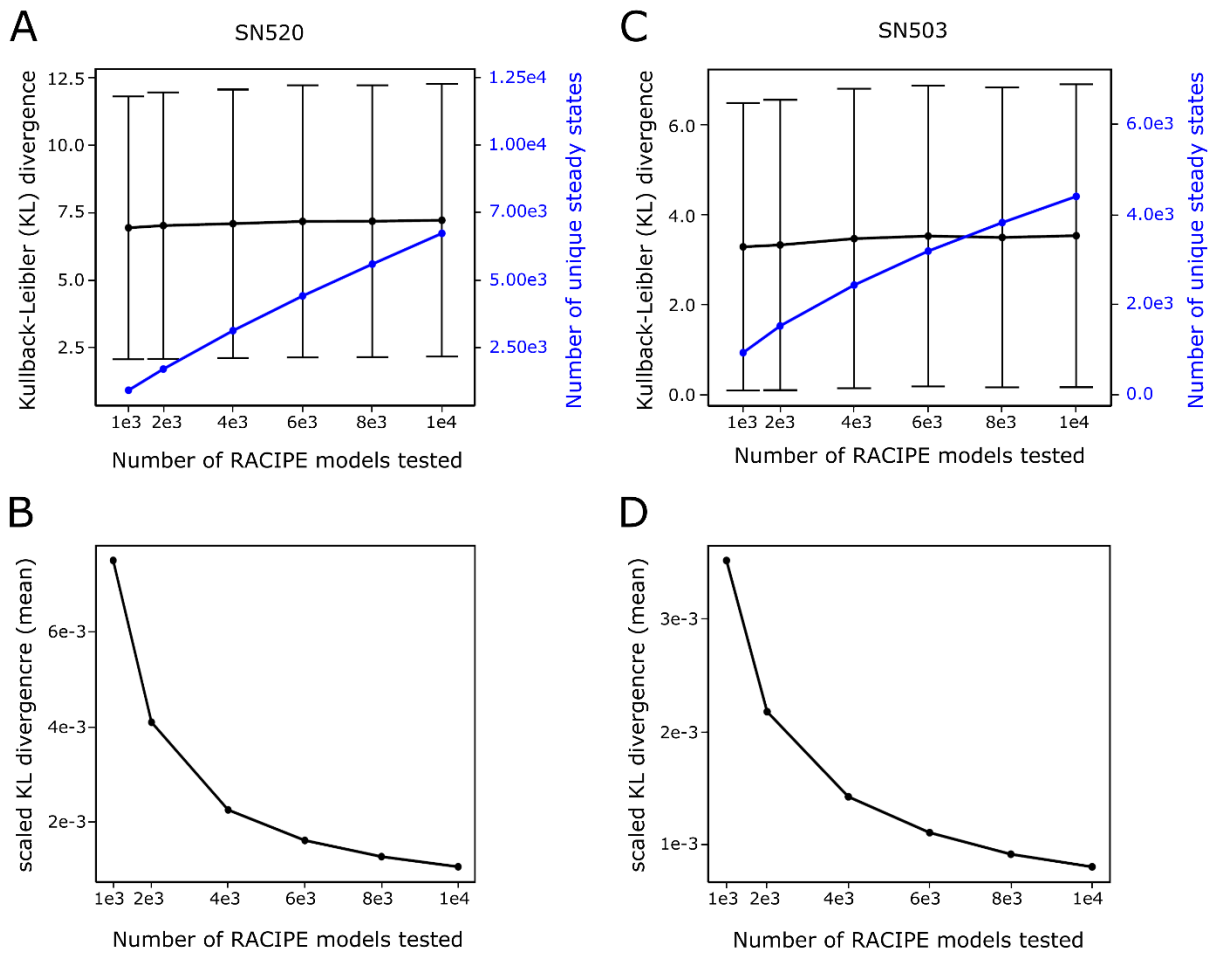

310  
 311 **Fig. S13. Convergence of RACIPE simulations of TF-TF networks. (A)** Kullback-Leibler  
 312 divergence distances (black) of simulated states generated by SYGNAL-520 with respect to one  
 313 another. Simulated states were generated using the respective TF-TF network using a different  
 314 number of model simulation parameters (1e3, 2e3, 4e3, 6e3, 8e3, and 1e4 randomly selected  
 315 model parameters) across 100 randomly selected initial conditions. Number of unique states  
 316 (blue) is based on the number of steady states identified having a specified Euclidean distance  
 317 greater than its nearest neighbors (METHODS). **(B)** Kullback-Leibler divergence distances  
 318 normalized with respect to number of unique states identified per set of simulations performed  
 319 using SYGNAL-520. **(C-D)** Kullback-Leibler divergence distances and normalized distances,  
 320 respectively, determined from simulations using SYGNAL-503.  
 321

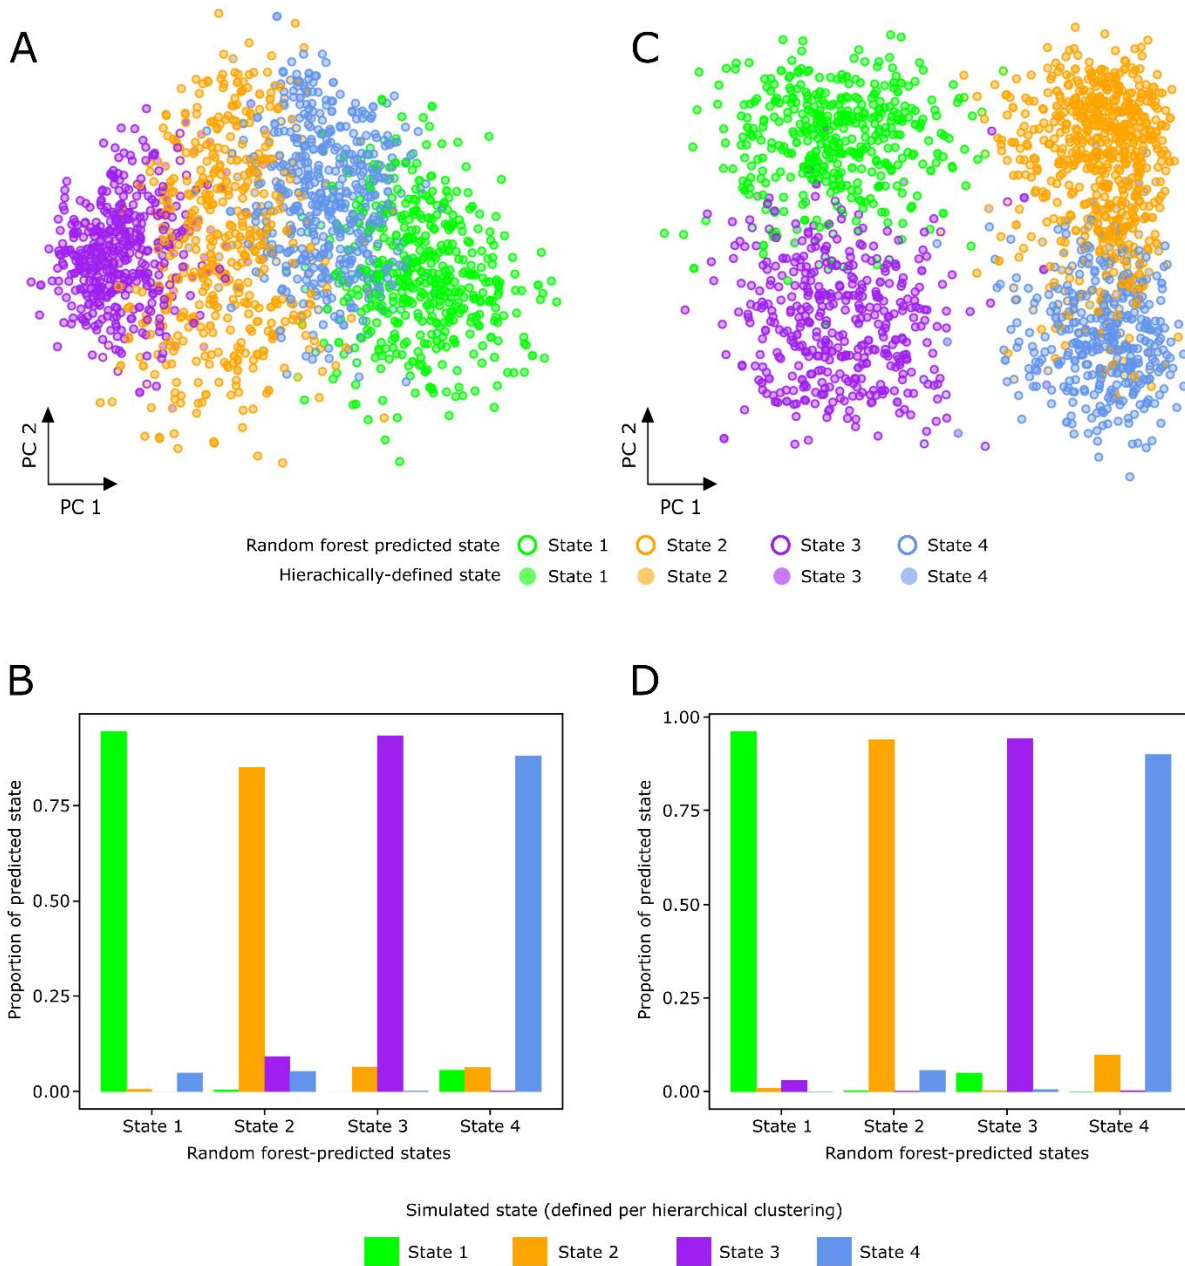

322

323 **Fig. S14. Random forest model predicts cell state with high-level of accuracy. (A)** PCA plot

324 of a randomly selected subset of 2,000 simulated states, i.e., TF expression profile, from the 1e6

325 simulations performed using SYGNAL-520 (Fig 6C). Each dot represents a simulation output. Fill

326 colors for each dot represent the state of the cell as defined by hierarchical clustering of the cells.

327 Border colors represent the state of the predicted simulated state using the random forest model

328 trained on the non-redundant states generated from the 1e6 simulations (6,519 states and 4,223

329 states for SN520 and SN503, respectively). **(B)** Proportion of each actual state, defined by

330 hierarchical clustering, within the predicted simulated states for SN520. **(C)** PCA plot of a  
331 randomly selected subset of 2,000 simulated states for SN503. **(D)** Proportion of actual states  
332 within each predicted state for SN503.

333

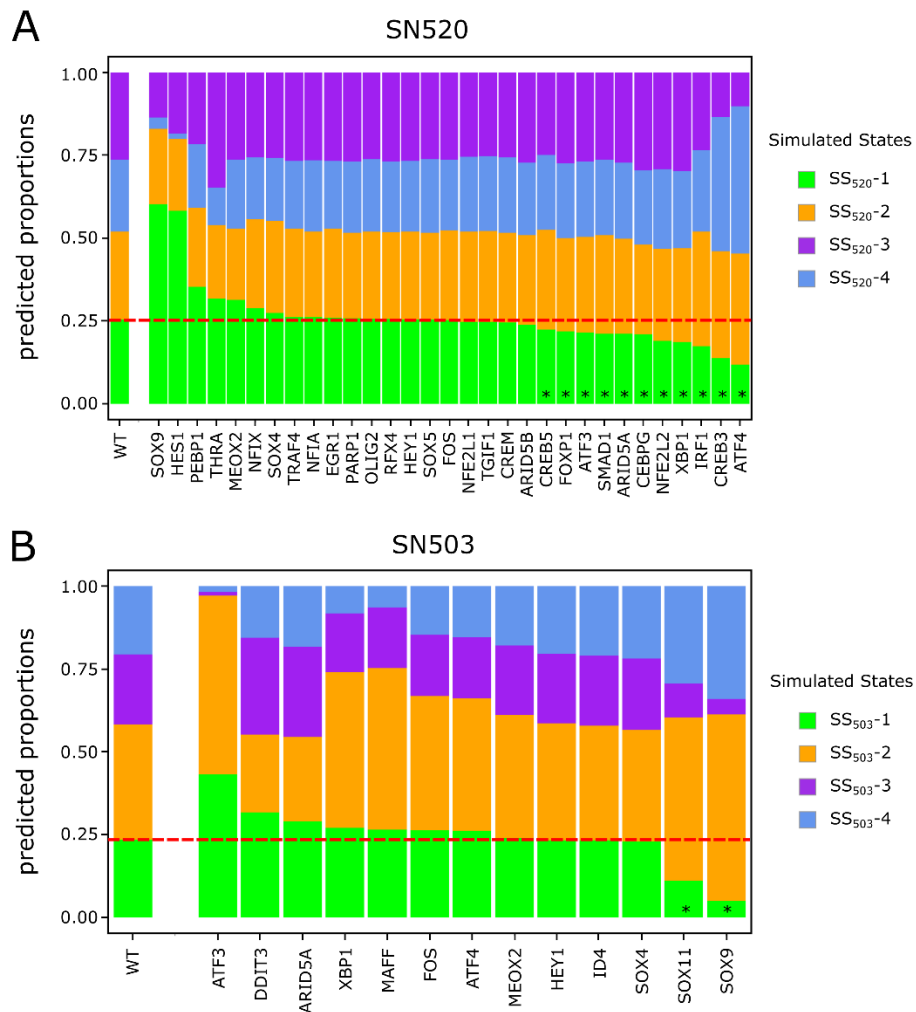

334  
 335 **Fig. S15. *In silico* KD simulations in SYGNAL-520/503. (A)** Stacked bar plot depicting  
 336 proportion of simulated states assigned to one of four simulated states (SS<sub>520-*i*</sub>) identified from  
 337 hierarchical clustering of RACIPE simulations using SYGNAL-520 (Figure 6C) in response to a  
 338 95% knock down (KD) in expression of particular TF. TFs are rank ordered according to the  
 339 proportion of simulated states assigned to SS<sub>520</sub>-1 (green), which corresponds to a mesenchymal  
 340 state. **(B)** Stacked bar plot depicting proportion of simulated states assigned to one of four  
 341 simulated states (SS<sub>503-*i*</sub>) identified from hierarchical clustering of RACIPE simulations using  
 342 SYGNAL-503 (Figure 6E) in response to a 95% knock down (KD) in expression of particular TF.  
 343 TFs are rank ordered according to the proportion of simulated states assigned to SS<sub>503</sub>-1, which  
 344 contained the largest proportion of mesenchymal cells.

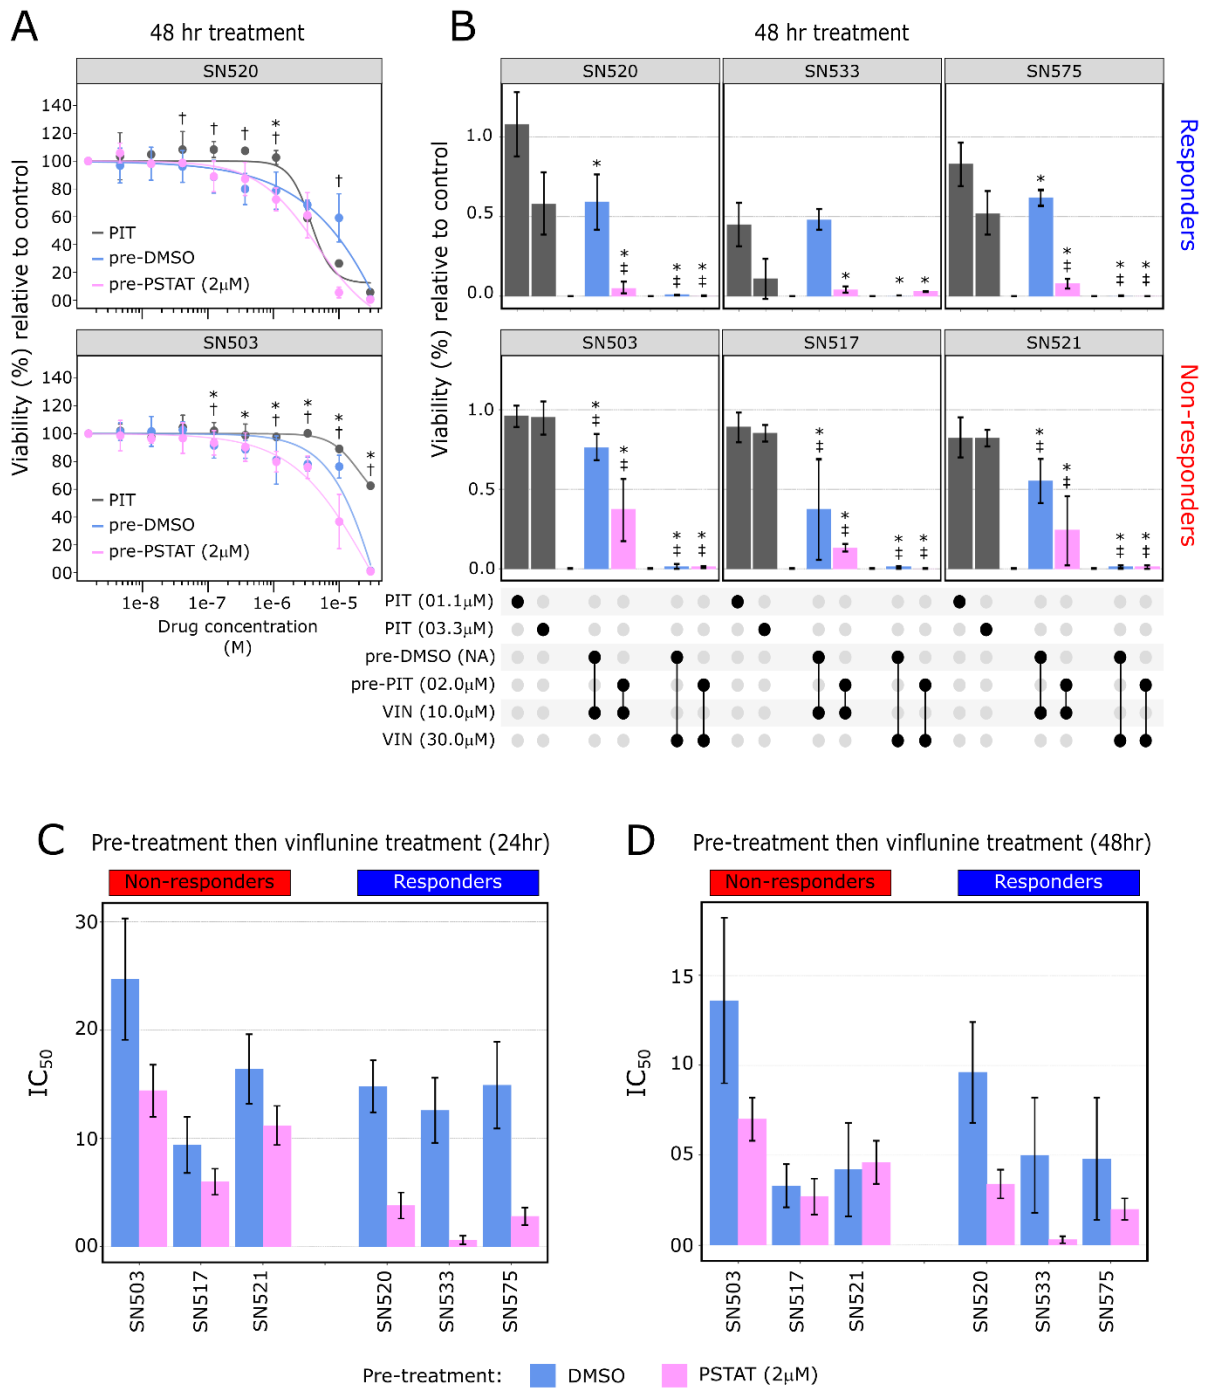

346

347 **Fig. S16. Pitavastatin pretreatment (48hrs) improves vinflunine efficacy in PD-GSCs. (A)**

348 Dose-response curves for SN520 (top) and SN503 (bottom) under pitavastatin monotherapy (at

349 concentrations of 1.5e-9, 4.6e-9, 13.7e-9, 41.2e-9, 123.5e-9, 370.4e-9, 1.10e-6, 3.30e-6, 10.0e-

350 6 30.0e-6 M, dark grey) or combination therapy, which includes pretreatment with DMSO (light

351 blue) or pitavastatin (2µM, pink) for 48hrs and subsequent treatment with vinflunine (at identical

352 concentrations used in pitavastatin monotherapy). Asterisks indicate cells pretreated with DMSO  
353 have significantly lower relative viability than cells treated with pitavastatin alone ( $FDR \leq 0.1$ ).  
354 Crosses indicate cells pretreated with pitavastatin ( $2\mu\text{M}$ ) have significantly lower relative viabilities  
355 than cells treated with pitavastatin alone ( $FDR \leq 0.1$ ). Error bars represent  $\pm 2x$  standard deviation  
356 ( $N = 3$ ). **(B)** Relative viabilities of PD-GSCs after treatment including monotherapy with  
357 pitavastatin (PIT), pretreatment with DMSO (pre-DMSO) or pitavastatin (pre-PIT) followed by  
358 vinflunine (VIN) at specified concentrations. Black dots underneath barplots indicate respective  
359 treatment(s). Asterisks indicate conditions that have significantly lower relative viability cells  
360 treated with pitavastatin alone ( $1.1\mu\text{M}$ ,  $FDR \leq 0.1$ ). Double crosses indicate conditions that have  
361 significantly lower relative viabilities than cells treated with pitavastatin alone ( $3.3\mu\text{M}$   $FDR \leq 0.1$ ).  
362 Colors correspond to annotation in (A). Error bars represent  $\pm 2x$  standard deviation ( $N=3$ ). (C)  
363  $IC_{50}$  values based on 72hr pre-treatment with either DMSO or pitavastatin ( $2\mu\text{M}$ ) followed by 24hr  
364 treatment with vinflunine. (D)  $IC_{50}$  values based on 72hr pre-treatment with either DMSO or  
365 pitavastatin ( $2\mu\text{M}$ ) followed by 48hr treatment with vinflunine. Error bars in (C-D) represent  $\pm 2x$   
366 standard deviation ( $N = 3$ ).  
367

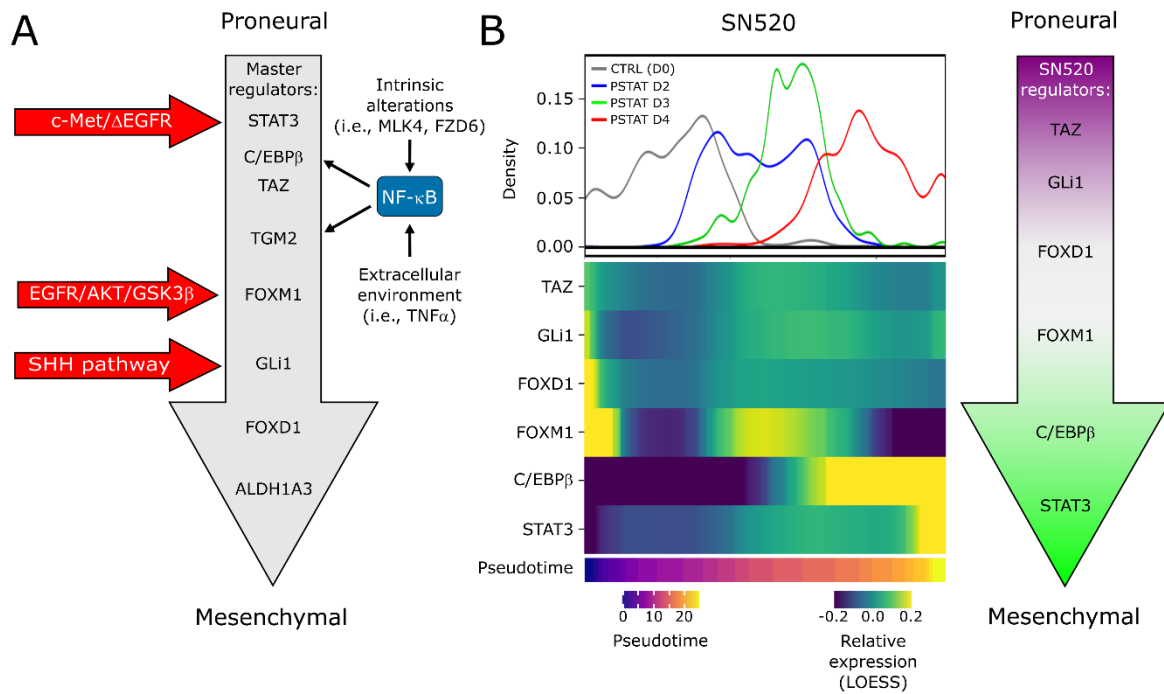

368

369 **Fig. S17. SN520 exhibits a sequence of TF expression distinct from previously proposed**

370 **mechanisms of PMT. (A) Master regulators driving PMT in GBM. Figure modified from (58). (B)**

371 **Sequence of TF expression of master regulators per (58) observed in SN520. Density plot and**

372 **heatmap align with pseudotime (bottom color bar). Density plot shows proportion of cells**

373 **belonging to each treatment condition arranged according to pseudotime. Heatmap shows**

374 **relative expression (LOESS regression) of TF expression along pseudotime. TFs listed are**

375 **master regulators overlapping in SN520 scRNA-seq data set. TFs are listed in sequential order**

376 **according to their peak expression, which differs considerably from (A).**

377



378 **Table S1 – S16 (separate file)**  
379 **Supplementary tables referenced in manuscript.**  
380  
381 **Table S1.**  
382 **Enriched gene sets in up-regulated DEGs in each treatment condition - SN520.**  
383  
384 **Table S2.**  
385 **Enriched gene sets in up-regulated DEGs in Louvain clusters - SN520.**  
386  
387 **Table S3.**  
388 **Enriched gene sets in up-regulated DEGs in each treatment condition - SN503.**  
389  
390 **Table S4.**  
391 **Enriched gene sets in up-regulated DEGs in Louvain clusters - SN503.**  
392  
393 **Table S5.**  
394 **SN520 regulon summary.**  
395  
396 **Table S6.**  
397 **SN520 miRNA regulators (FIRM results).**  
398  
399 **Table S7.**  
400 **Enrichment of essential GSC genes (MacLeod et al. 2019) in SN520 transcriptional**  
401 **programs.**  
402  
403 **Table S8.**  
404 **SN520 gene set enrichment of transcriptional programs.**  
405  
406 **Table S9.**  
407 **SN503 regulon summary.**  
408  
409 **Table S10.**  
410 **SN503 miRNA regulators (FIRM results).**  
411

412

413 **Table S11.**

414 **Enrichment of essential GSC genes (MacLeod et al. 2019) in SN503 transcriptional**  
415 **programs.**

416

417 **Table S12.**

418 **SN503 gene set enrichment of transcriptional programs.**

419

420 **Table S13.**

421 **Transcription factor summary of TF-TF networks.**

422

423 **Table S14.**

424 **PD-GSC metadata.**

425

426 **Table S15.**

427 **HDAC-inhibition DEG overlap count and enrichment in PD-GSC DEGs.**

428

429 **Table S16.**

430 **Experimental inoculation densities.**
